# Supplementary material
Source: PubMed Central journal article supplement (PMC4068669)

**TABLE S1** Observed diversity and estimated sample coverage in 16S rRNA sequencing analysis of Canestrato Pugliese cheese during manufacture and ripening

| <b>Days of ripening</b> | <b>No. of reads</b> | <b>No. of OTUs</b> | <b>Chao1 richness</b> | <b>Shannon diversity index</b> | <b>ESC (%)</b> |
|-------------------------|---------------------|--------------------|-----------------------|--------------------------------|----------------|
| Milk                    | 5727                | 14                 | 17.33                 | 1.43                           | 99%            |
| Curd <sup>a</sup>       | 3555                | 44                 | 46.57                 | 3.05                           | 99%            |
| 1 <sup>b</sup>          | 5001                | 34                 | 38.66                 | 1.15                           | 99%            |
| 3                       | 2206                | 23                 | 26.33                 | 0.75                           | 99%            |
| 7                       | 6334                | 36                 | 49.75                 | 0.92                           | 99%            |
| 15                      | 9357                | 39                 | 43.20                 | 1.75                           | 99%            |
| 30                      | 8945                | 40                 | 42.50                 | 1.27                           | 99%            |
| 45                      | 3687                | 41                 | 44.00                 | 2.06                           | 99%            |
| 60                      | 7843                | 45                 | 52.33                 | 2.08                           | 99%            |
| 75                      | 7965                | 43                 | 51.25                 | 1.65                           | 99%            |
| 90                      | 6304                | 43                 | 47.00                 | 1.99                           | 99%            |

Abbreviations: OTU, operational taxonomic unit; ESC, estimated sample coverage. Chao1 richness, Shannon diversity, and ESC were calculated with Qiime at the 3% distance level.

<sup>a</sup>Curd after moulding.

<sup>b</sup>Curd after dry salting.

**TABLE S2** Community Level Catabolic Profiles (CLCPs) of Canestrato Pugliese cheese during manufacture and ripening

| Days of ripening  | <i>H'</i>     | <i>S</i>      | <i>E</i>      |
|-------------------|---------------|---------------|---------------|
| Milk              | 2.68 ± 0.2 D  | 12.33 ± 1.5D  | 2.64 ± 0.2BC  |
| Curd <sup>a</sup> | 3.00 ± 0.1C   | 16.67 ± 2.5 B | 2.46 ± 0.1A   |
| 1 <sup>b</sup>    | 2.71 ± 0.1 E  | 12.68 ± 1.5 D | 2.47 ± 0.2A   |
| 3                 | 3.25 ± 0.1 A  | 20.33 ± 0.2 A | 2.49 ± 0.1A   |
| 7                 | 3.09 ± 0.3 BC | 15.67 ± 1.1 B | 2.59 ± 0.2B   |
| 15                | 3.15 ± 0.2 B  | 16.00 ± 1.5 B | 2.61 ± 0.3B   |
| 30                | 3.03 ± 0.2 C  | 16.67 ± 0.6B  | 2.48 ± 0.1A   |
| 45                | 3.00 ± 0.3 C  | 15.23 ± 2.1B  | 2.53 ± 0.3AB  |
| 60                | 3.03 ± 0.1C   | 13.67 ± 1.5C  | 2.68 ± 0.2 BC |
| 75                | 3.09 ± 0.2 BC | 13.67 ± 1.1C  | 2.72 ± 0.1C   |
| 90                | 2.84 ± 0.1D   | 13.33 ± 0.6C  | 2.53 ± 0.2AB  |

Each value was expressed as the mean ± standard deviations for two batches of each type of cheese, analysed in triplicate.

Means within the column with different letters (A-D) are significantly different ( $P < 0.05$ ).

*H'*, Shannon's diversity; *S*, substrate richness; *E*, substrate evenness.

<sup>a</sup>Curd after moulding.

<sup>b</sup>Curd after dry salting

**TABLE S3** Correlations<sup>a</sup> between the abundance of operational taxonomic units (OTUs) and total free amino acid (FFA), concentration of Asp, Glu, Leu, Phe, and Val, area of hydrophilic and hydrophobic peaks<sup>b</sup>, and carbon substrates<sup>c</sup> (polimers, amines, carboxylic acids, carbohydrates, and amino acids)

| Descriptors | Significance | Abundance of OTUs            |                          |                             |                          |                                   |                  |                   |                         |
|-------------|--------------|------------------------------|--------------------------|-----------------------------|--------------------------|-----------------------------------|------------------|-------------------|-------------------------|
|             |              | <i>L. plantarum</i><br>group | <i>L. casei</i><br>group | <i>Lactobacillus</i><br>sp. | <i>L. sakei</i><br>group | <i>Lactobacillaceae</i><br>family | <i>L. brevis</i> | <i>Lc. lactis</i> | <i>St. thermophilus</i> |
| FAA         | P            | 3.92E-08                     | 7.90E-05                 | 0.00013                     | 0.00028                  | 0.0012                            | 0.0019           |                   |                         |
|             | FDR          | 8.23E-07                     | 0.0008                   | 0.0009                      | 0.0015                   | 0.0049                            | 0.0067           |                   |                         |
|             | r            | 0.89                         | 0.74                     | 0.72                        | 0.70                     | 0.64                              | 0.62             |                   |                         |
| Asp         | P            | 1.49E-07                     | 6.12E-05                 | 0.0003                      | 0.0004                   |                                   |                  |                   |                         |
|             | FDR          | 3.14E-06                     | 0.0006                   | 0.002                       | 0.0025                   |                                   |                  |                   |                         |
|             | r            | 0.87                         | 0.75                     | 0.69                        | 0.69                     |                                   |                  |                   |                         |
| Glu         | P            | 4.05E-07                     | 0.0001                   | 0.00064                     | 0.0004                   |                                   |                  |                   |                         |
|             | FDR          | 8.50E-06                     | 0.0012                   | 0.0034                      | 0.0029                   |                                   |                  |                   |                         |
|             | r            | 0.85                         | 0.73                     | 0.67                        | 0.68                     |                                   |                  |                   |                         |
| Leu         | P            | 5.40E-08                     | 2.61E-05                 | 0.00013                     | 0.0002                   |                                   | 0.0027           |                   |                         |
|             | FDR          | 1.13E-06                     | 0.0003                   | 0.0009                      | 0.0009                   |                                   | 0.011            |                   |                         |
|             | r            | 0.88                         | 0.77                     | 0.72                        | 0.72                     |                                   | 0.61             |                   |                         |
| Phe         | P            | 3.36E-08                     | 3.52E-05                 | 0.0002                      | 0.0002                   |                                   | 0.0024           |                   |                         |
|             | FDR          | 7.07E-07                     | 0.0004                   | 0.0011                      | 0.0013                   |                                   | 0.01             |                   |                         |
|             | r            | 0.89                         | 0.76                     | 0.71                        | 0.71                     |                                   | 0.61             |                   |                         |
| Val         | P            | 9.21E-08                     | 5.29E-05                 | 0.0002                      | 0.0002                   |                                   |                  |                   |                         |
|             | FDR          | 1.93E-06                     | 0.0005                   | 0.0013                      | 0.0011                   |                                   |                  |                   |                         |
|             | r            | 0.88                         | 0.75                     | 0.71                        | 0.71                     |                                   |                  |                   |                         |

**TABLE S3** (continued)

| Descriptors            | Significance | Abundance of OTUs            |                          |                             |                          |                                   |                  |                   |                         |
|------------------------|--------------|------------------------------|--------------------------|-----------------------------|--------------------------|-----------------------------------|------------------|-------------------|-------------------------|
|                        |              | <i>L. plantarum</i><br>group | <i>L. casei</i><br>group | <i>Lactobacillus</i><br>sp. | <i>L. sakei</i><br>group | <i>Lactobacillaceae</i><br>family | <i>L. brevis</i> | <i>Lc. lactis</i> | <i>St. thermophilus</i> |
| Area hydrophilic peaks | P            | 3.56E-07                     | 0.0001                   | 0.0002                      | 8.80E-05                 | 0.0009                            | 0.0015           |                   |                         |
|                        | FDR          | 7.47E-06                     | 0.0009                   | 0.0010                      | 0.0009                   | 0.003                             | 0.005            |                   |                         |
|                        | r            | 0.86                         | 0.72                     | 0.71                        | 0.74                     | 0.65                              | 0.63             |                   |                         |
| Area hydrophobic peaks | P            |                              |                          |                             |                          |                                   |                  |                   | 0.002                   |
|                        | FDR          |                              |                          |                             |                          |                                   |                  |                   | 0.04                    |
|                        | r            |                              |                          |                             |                          |                                   |                  |                   | 0.62                    |
| Polymers               | P            |                              |                          |                             |                          |                                   |                  | 5.69E-09          |                         |
|                        | FDR          |                              |                          |                             |                          |                                   |                  | 1.19E-07          |                         |
|                        | r            |                              |                          |                             |                          |                                   |                  | 0.91              |                         |
| Amines                 | P            |                              |                          |                             |                          |                                   |                  | 0.0061            |                         |
|                        | FDR          |                              |                          |                             |                          |                                   |                  | 0.043             |                         |
|                        | r            |                              |                          |                             |                          |                                   |                  | 0.60              |                         |
| Carbohydrates          | P            |                              |                          |                             |                          |                                   |                  | 0.0003            |                         |
|                        | FDR          |                              |                          |                             |                          |                                   |                  | 0.007             |                         |
|                        | r            |                              |                          |                             |                          |                                   |                  | 0.69              |                         |
| Amino acids            | P            |                              |                          |                             |                          |                                   |                  | 3.77E-07          |                         |
|                        | FDR          |                              |                          |                             |                          |                                   |                  | 7.92E-06          |                         |
|                        | r            |                              |                          |                             |                          |                                   |                  | 0.85              |                         |

<sup>a</sup>Only the positive correlations with a P<0.05, FDR<0.05 and r>0.06 are reported.

<sup>b</sup>Area of hydrophilic and hydrophobic peaks of the pH 4.6-soluble nitrogen fractions analyzed by reverse phase high pressure liquid chromatography (RP-HPLC) were recognized and matched visually with the Unicorn program (Amersham Biosciences).

<sup>c</sup>Utilization of carbon substrates was carried out by using Biolog Eco-Microplates containing 31 carbon substrates grouped for chemical class (polimers, amines, carbohydrates, and amino acids).

**FIGURE S1** Urea-polyacrylamide gel electrophoresis (PAGE) of the pH 4.6-insoluble (A) and -soluble (B) nitrogen fractions during manufacture and ripening of Canestrato Pugliese cheese. Lanes: 1, ovine casein (CN) standard; 2, curd after moulding; 3 - 11, cheese (post dry salting) after 1, 3, 7, 15, 30, 45, 60, 75 and 90 days of ripening, respectively.

(A)

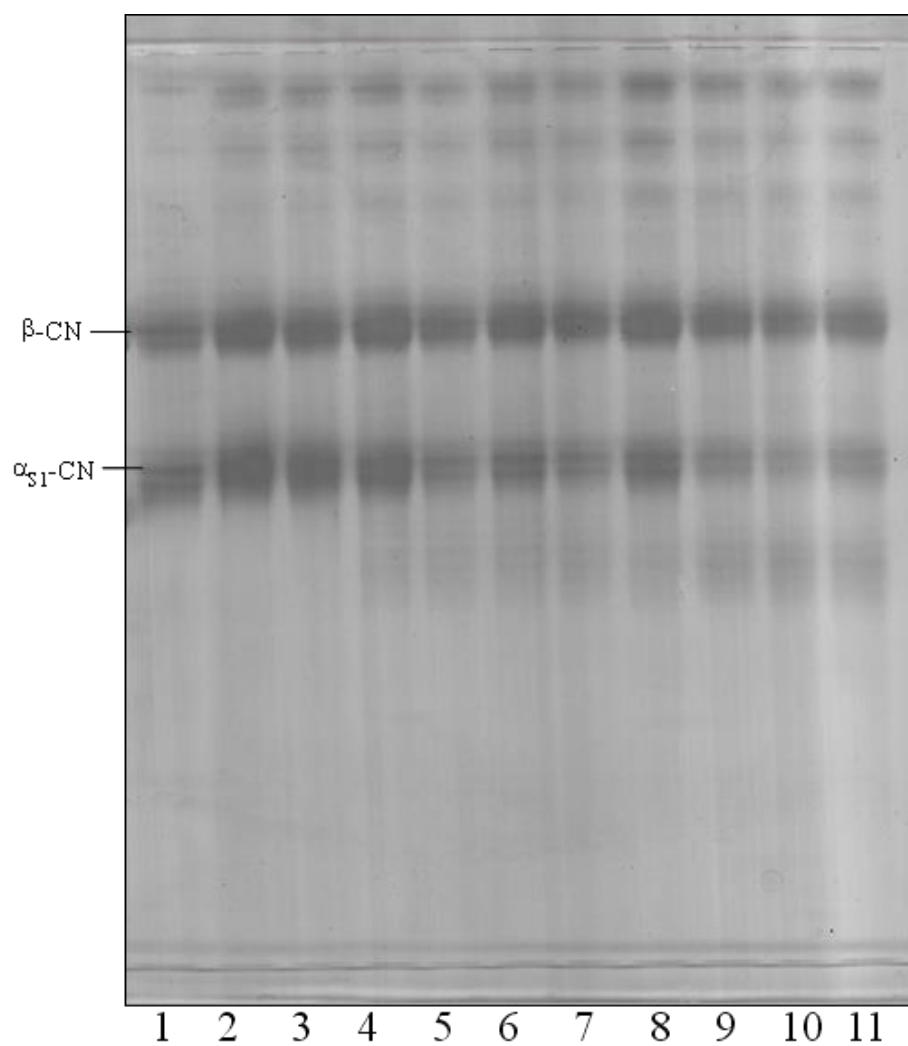

(B)

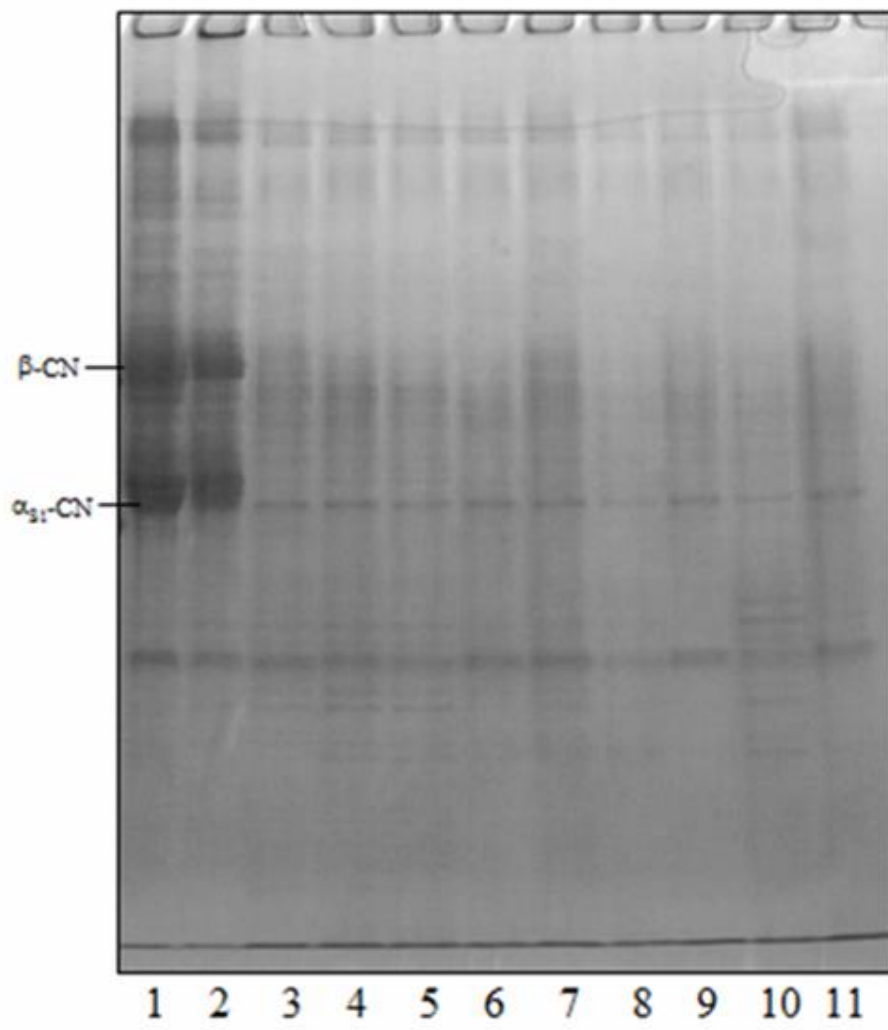

Supplement: AEM.00757-14_zam999105466so1.pdf [file AEM.00757-14_zam999105466so1.pdf]
